# Supplementary material for: Chemical Composition of Pinus roxburghii Bark Volatile Oil and Validation of Its Anti-Inflammatory Activity Using Molecular Modelling and Bleomycin-Induced Inflammation in Albino Mice
Source: PubMed Central journal article supplement (PMC6151475; doi:10.3390/molecules22091384), 2017-08-29
Supplement: molecules-22-01384-s001.pdf [file molecules-22-01384-s001.pdf]

## Supplementary data

# Chemical Composition of *Pinus roxburghii* Bark Volatile Oil and Validation of Its Anti-Inflammatory Activity Using Molecular Modelling and Bleomycin-Induced Inflammation in *Albino* Mice

Rola M. Labib <sup>1,2,\*</sup>, Fadia S. Youssef <sup>1</sup>, Mohamed L. Ashour <sup>1</sup>, Mohamed M. Abdel-Daim <sup>3</sup> and Samir A. Ross <sup>2,4</sup>

<sup>1</sup> Department of Pharmacognosy, Faculty of Pharmacy, Ain-Shams University, Cairo 11566, Egypt; fadiayoussef@pharma.asu.edu.eg (F.S.Y.); ashour@pharma.asu.edu.eg (M.L.A.)

<sup>2</sup> National Center for Natural Products Research, University of Mississippi, University, MS 38677, USA; sross@olemiss.edu

<sup>3</sup> Department of Pharmacology, Faculty of Veterinary Medicine, Suez Canal University, Ismailia 41522, Egypt; abdeldaim.m@vet.suez.edu.eg

<sup>4</sup> Department of BioMolecular Sciences, School of Pharmacy, University of Mississippi, University, MS 38677, USA

\* Correspondence: rolamilad@pharma.asu.edu.eg; Tel.: +20-1-001971922

**Figure S1:** (a) Alignment of the X-ray bioactive conformer with the best fitted pose of the lead compound (dexamethasone); (b) binding of palmitic acid within the active pocket of human glucocorticoid receptors (GR).

**Table S1:** The binding percentage of PRO on the cannabinoids and opioids receptors.

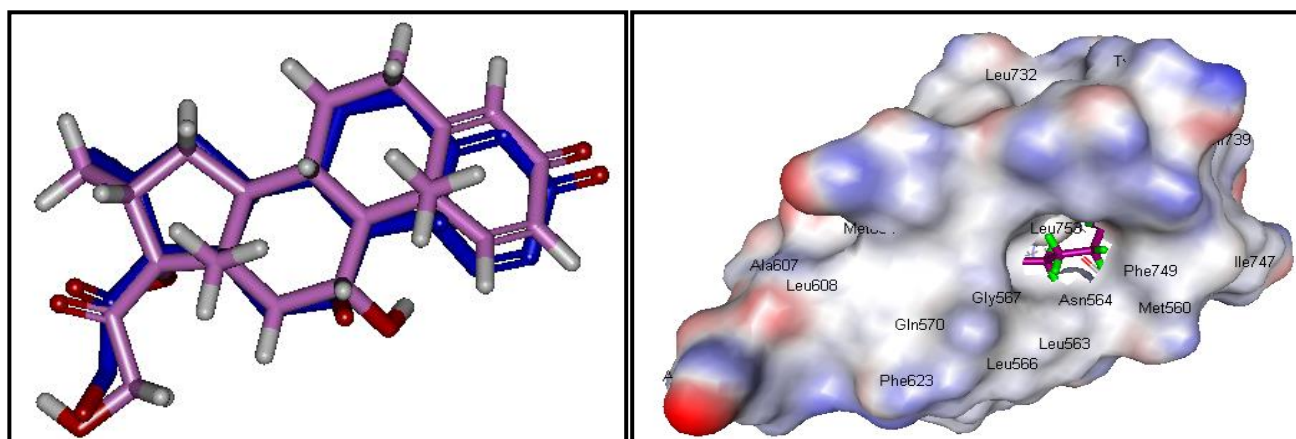

**Figure S1:** (a) Alignment of the X-ray bioactive conformer with the best fitted pose of the lead compound (dexamethasone); (b) binding of palmitic acid within the active pocket of human glucocorticoid receptors (GR).

**Table S1:** The binding percentage of PRO on the cannabinoids and opioids receptors.

| Receptor | CB1 | CB2 | <i>Delta</i> | <i>Kappa</i> | <i>Mu</i> |
|----------|-----|-----|--------------|--------------|-----------|
| PRO      | NA  | 2.9 | 6.9          | 10.9         | 22.0      |

NA: no activity
